# Supplementary material
Source: PubMed Central journal article supplement (PMC1698066)

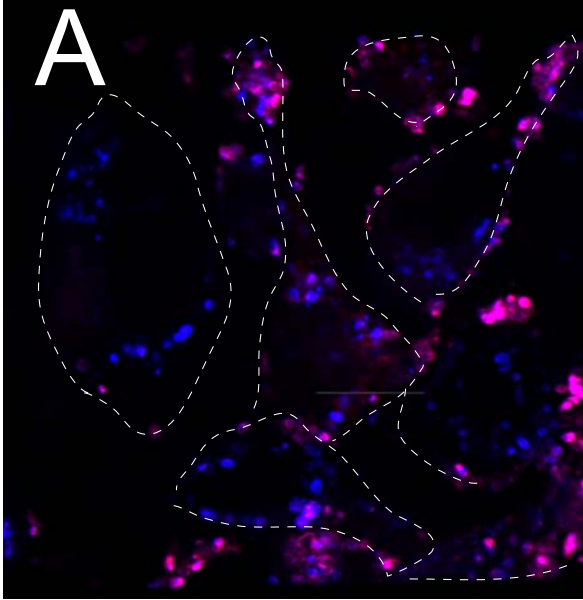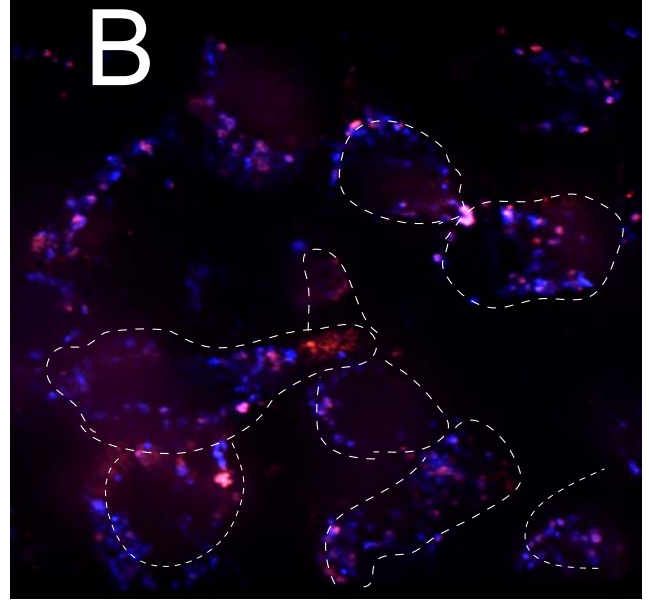

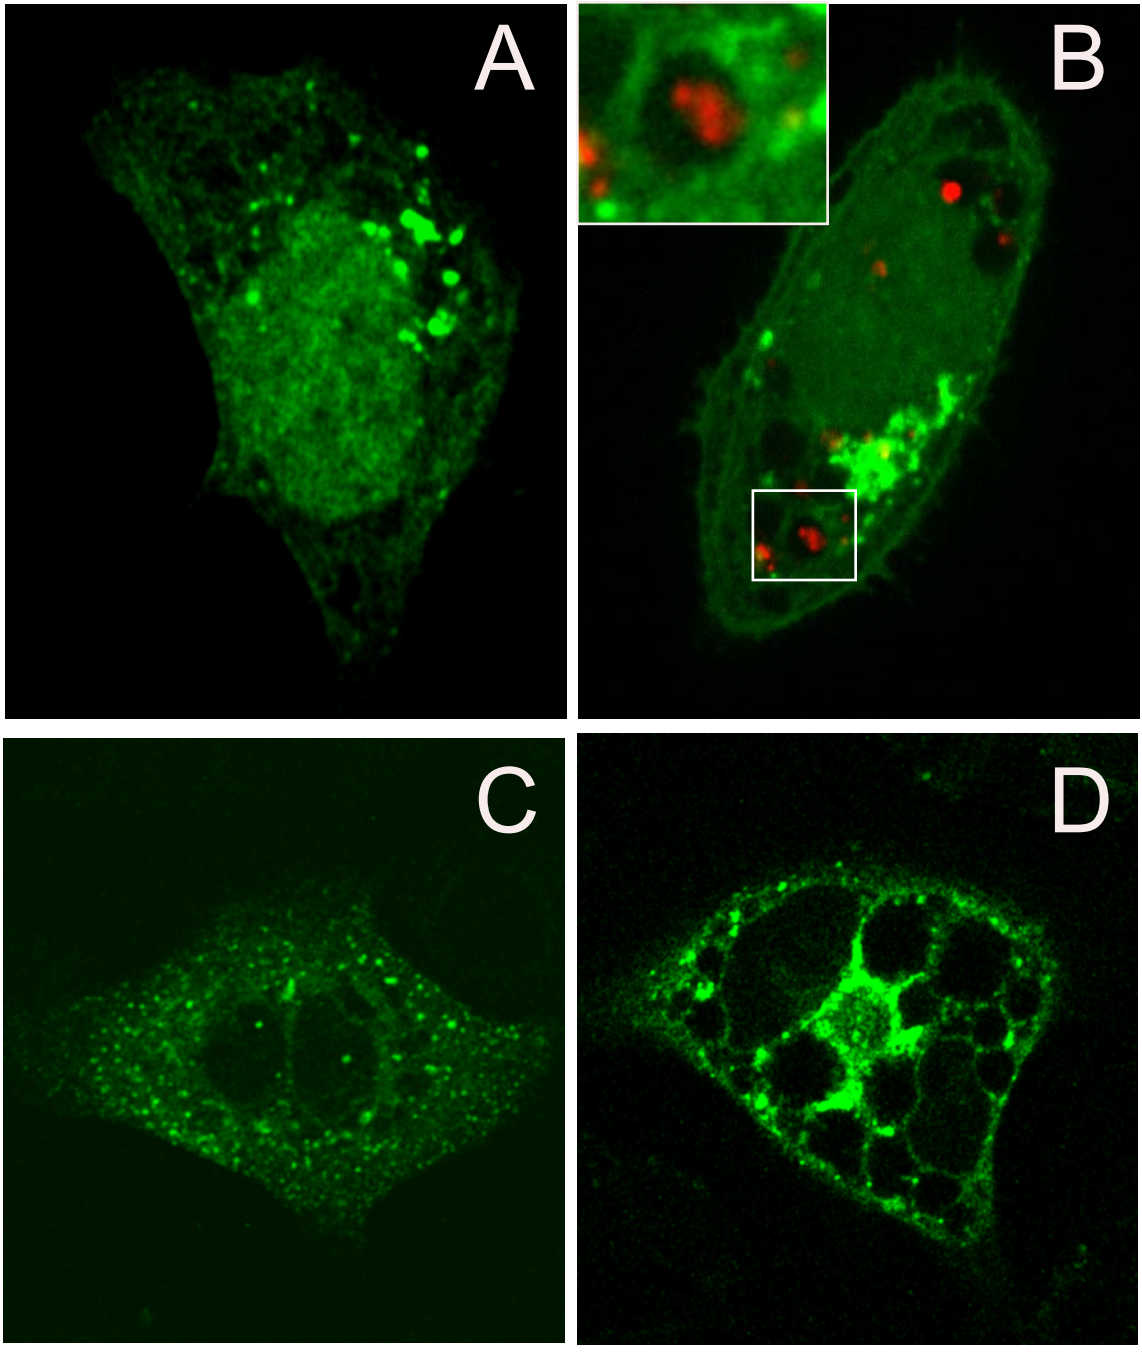

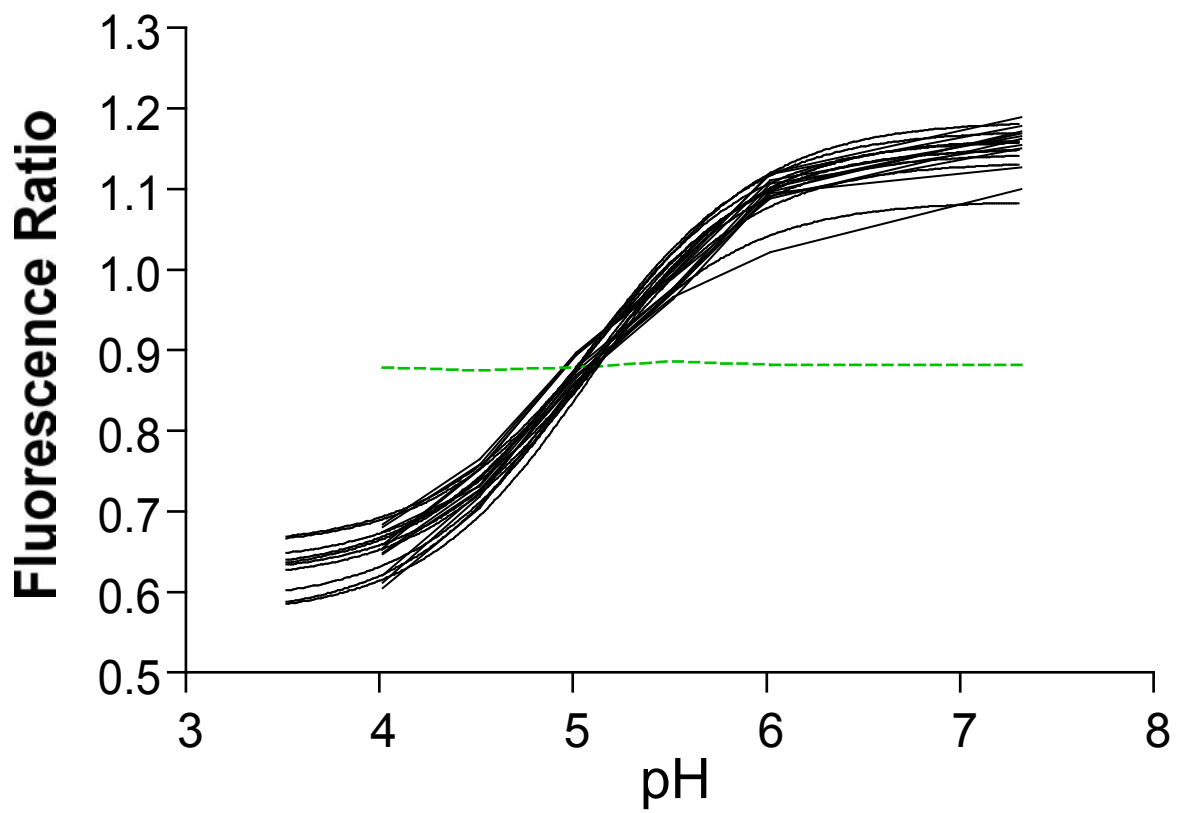

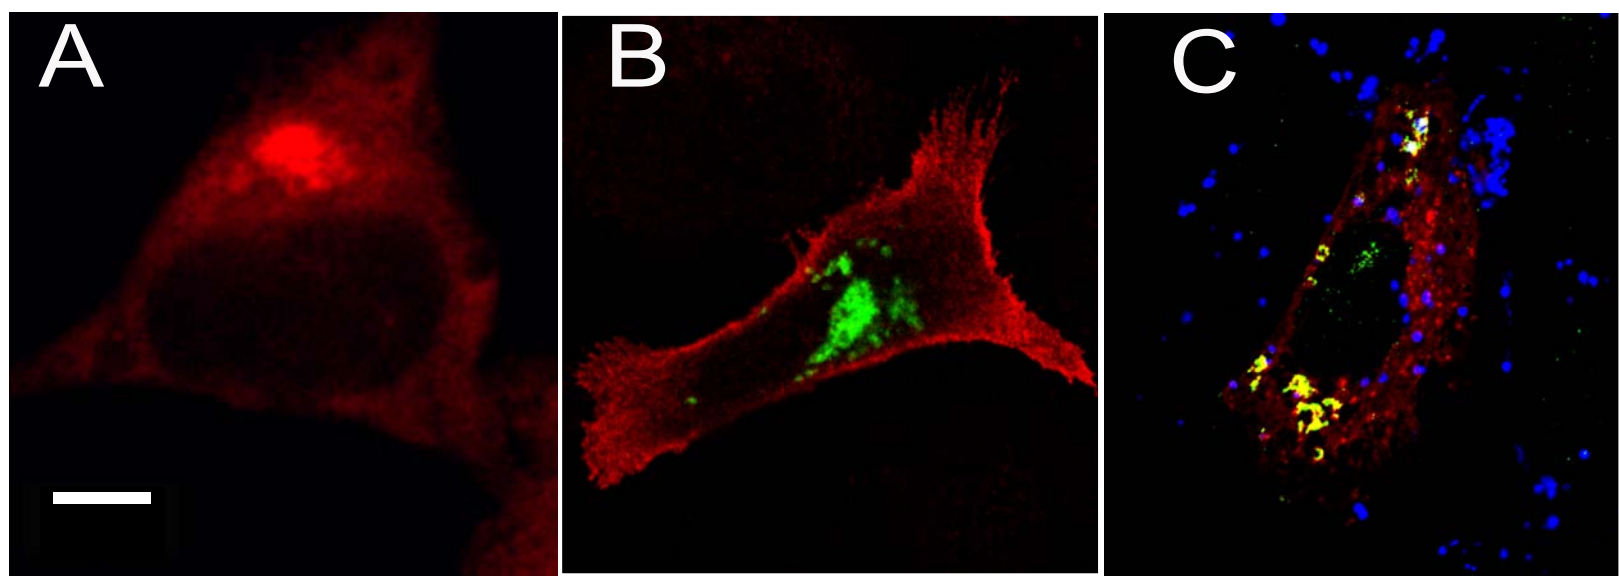

Supplement: iai_74_12_6599__1.pdf [file iai_74_12_6599__1.pdf]
